# Supplementary material for: Surface functionalization of electrospun scaffolds using recombinant human decorin attracts circulating endothelial progenitor cells
Source: PubMed Central journal article supplement (PMC5758628; doi:10.1038/s41598-017-18382-y), 2018-01-08
Supplement: 41598_2017_18382_MOESM1_ESM.pdf [file 41598_2017_18382_MOESM1_ESM.pdf]

# **Surface functionalization of electrospun scaffolds using recombinant human decorin attracts circulating endothelial progenitor cells**

**Svenja Hinderer<sup>1,2</sup>, Katrin Sudrow<sup>3</sup>, Maria Schneider<sup>3</sup>, Monika Holeiter<sup>2</sup>, Shannon Lee Layland<sup>1,2</sup>, Martina Seifert<sup>3</sup>, and Katja Schenke-Layland<sup>1,2,4\*</sup>**

<sup>1</sup> Dept. of Cell and Tissue Engineering, Fraunhofer-Institute for Interfacial Engineering and Biotechnology (IGB), 70569 Stuttgart, Germany

<sup>2</sup> Dept. of Women's Health, Research Institute for Women's Health, Eberhard-Karls-University Tübingen, 72076 Tübingen, Germany

<sup>3</sup> Institute of Medical Immunology and Berlin-Brandenburg Center for Regenerative Therapies (BCRT), Charité-Universitätsmedizin Berlin, corporate member of Freie Universität Berlin, Humboldt-Universität zu Berlin, and Berlin Institute of Health, 13353 Berlin, Germany

<sup>4</sup> Dept. of Medicine/ Cardiology, Cardiovascular Research Laboratories, David Geffen School of Medicine at UCLA, Los Angeles, CA, USA

## Supplementary figures

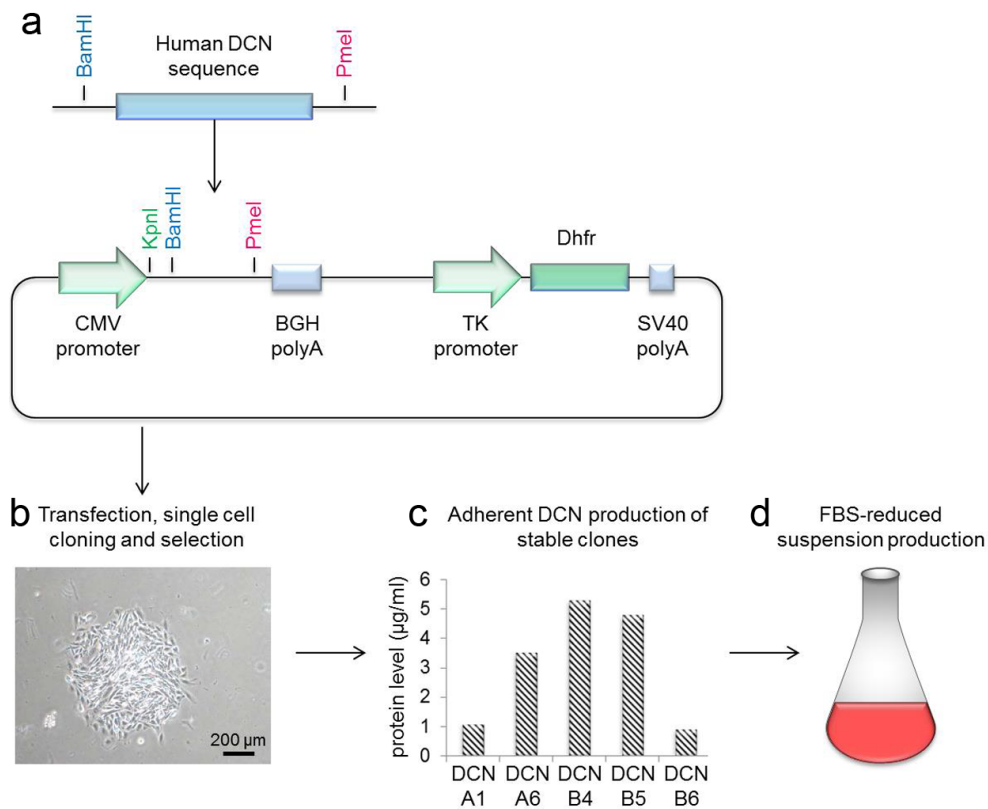

**Supplementary Figure S1:** (a) Schematic of the production plasmid generation from a synthesized codon-optimized human DCN sequence and the vector containing a wildtype (wt) dihydrofolate reductase (DHFR) expression cassette. (b) Adherent CHO cells were transfected with the production plasmid. Following single cell cloning and selection of stable clones for high protein production (c), the clones were adapted to suspension growth with reduced FBS content in Erlenmeyer flasks (d).

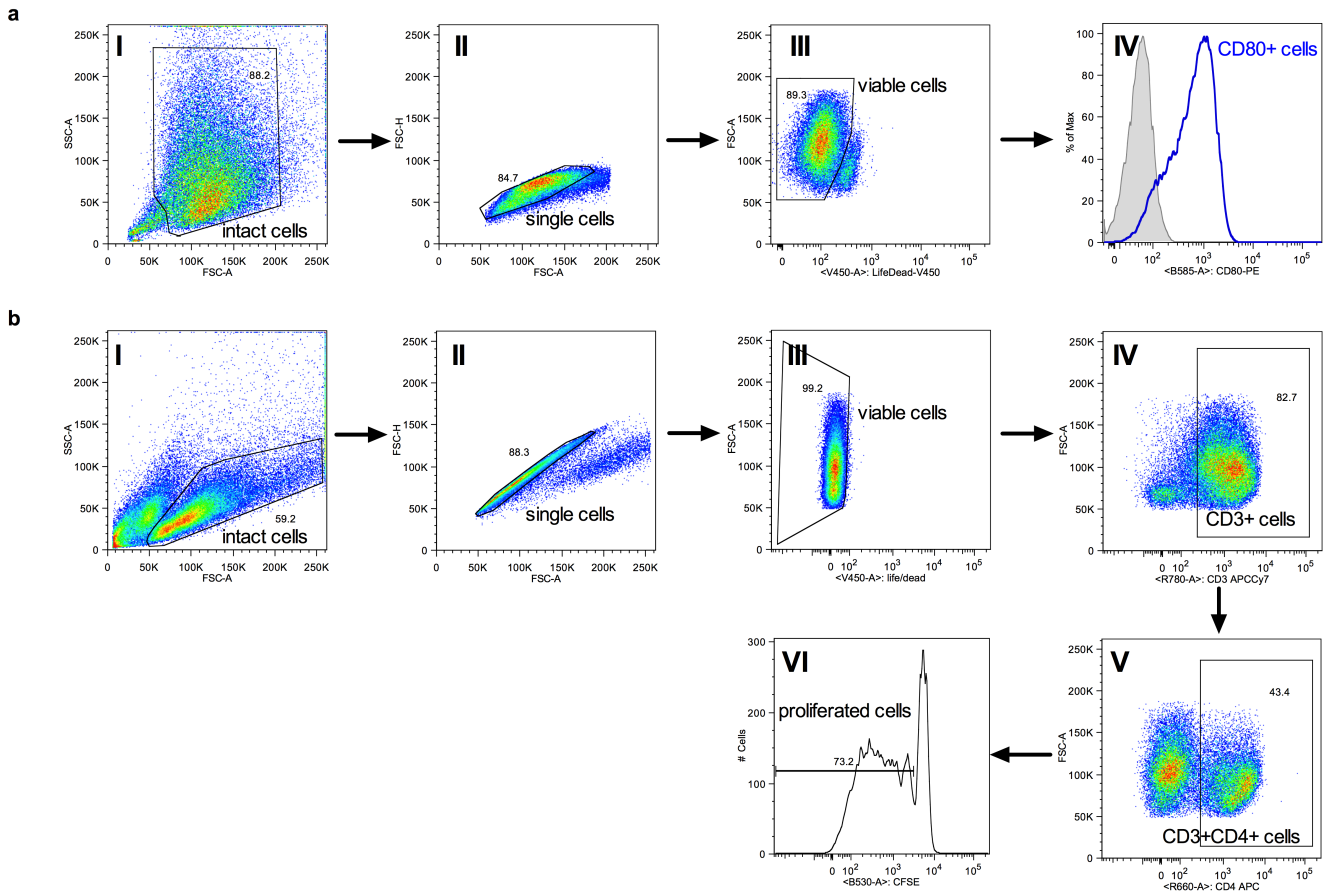

**Supplementary Figure S2:** The general gating strategies are shown for the analysis of macrophages after 24h-co-culture with DCN (**a**), and for human CFSE-labeled PBMCs after 5 days of co-culture with anti-CD3 and DCN (**b**). Macrophages were first gated based on their typical location in a scatter plot, (**a, I**), verified as single cells (**a, II**) and viable (**a, III**) before marker-positive cells (here, CD80+ cells) were determined in a histogram (**a, IV**). PBMCs were first gated based on their typical location in a scatter plot, (**b, I**), verified as single cells (**b, II**) and viable (**b, III**), before CD3+ (**b, IV**) and then CD3+CD4+ cells (**b, V**) were determined. Thereafter, the percentages of proliferated cells were analyzed (**b, VI**).

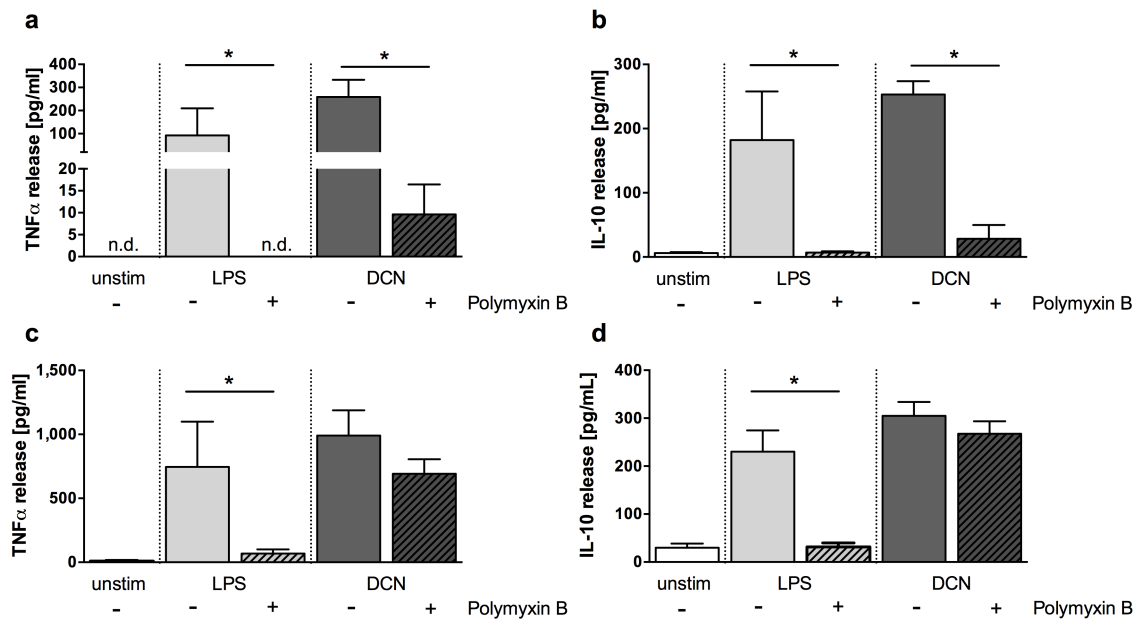

**Supplementary Figure S3:** Secretion of cytokines in DCN-stimulated monocyte and macrophage cultures. The relative release of TNF $\alpha$  (**a,c**) and IL-10 (**b,d**) after 7 days in co-culture with monocytes (**a,b**), and 24 hours in co-culture with M0 macrophages (**c,d**) with either DCN (50  $\mu$ g/mL) or lipopolysaccharide (LPS; 10  $\mu$ g/mL) alone or after pre-incubation with Polymyxin B (50  $\mu$ g/mL) is shown as mean  $\pm$  SD in comparison to unstimulated (unstim) cultures. Data were analyzed by Mann-Whitney U test; \*  $p < 0.05$  between Polymyxin B treated or untreated samples with  $n = 5$ .

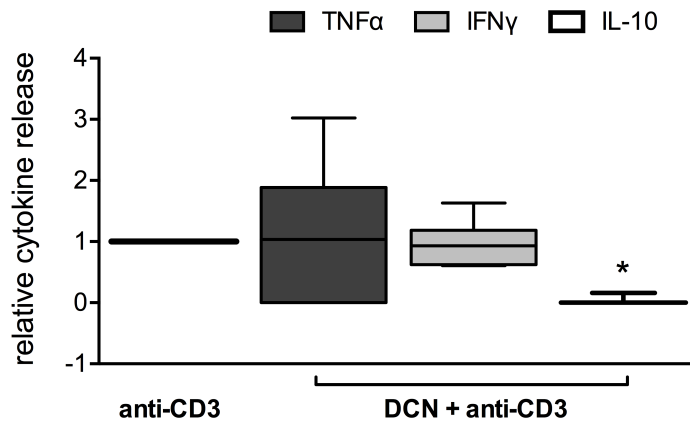

**Supplementary Figure S4:** The relative cytokine secretion of PBMC co-cultures after 5 days with either anti-CD3 alone or DCN combined with anti-CD3 is depicted for TNF $\alpha$ , IFN $\gamma$  and IL-10. Data for proliferation and cytokine release were analyzed by one-sample t-test; \*  $p < 0.05$  relative to the anti-CD3 control with  $n = 3-5$ .

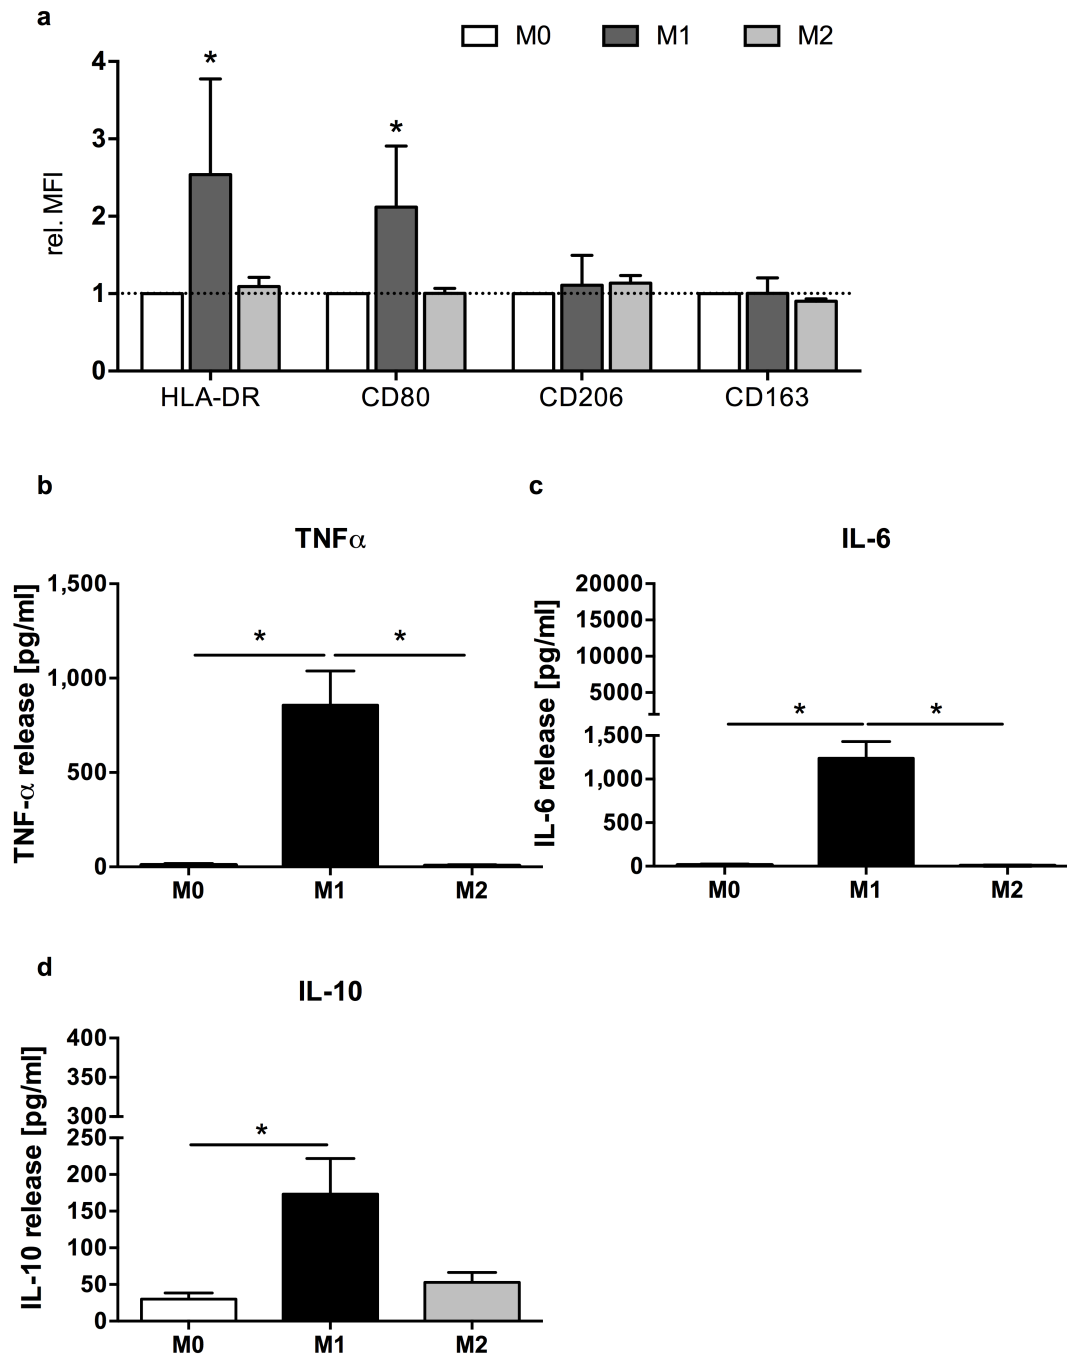

**Supplementary Figure S5:** Immunological features of polarized human macrophages. A characteristic surface marker expression and cytokine release for M0, M1 and M2 type macrophages is shown. Monocytes were differentiated into M0 type macrophages for 7 days using 50 ng/mL M-CSF. M0 type macrophages were polarized for 24h either towards M1 type macrophages by adding 20 ng/mL IFN- $\gamma$  and 100 ng/mL LPS, or into M2 type cells by adding 20 ng/mL IL-4. **(a)** Surface marker expression of HLA-DR, CD80, CD206 and CD163 was analyzed by flow cytometry and the relative mean fluorescence intensities (MFI) are shown as mean  $\pm$  SEM for n=5 independent experiments. Cell culture supernatants were harvested and analyzed for the secretion of **(b)** TNF $\alpha$ , **(c)** IL-6 and **(d)** IL-10 by ELISA. The cytokine release is shown as mean  $\pm$  SD for n=5 independent experiments; \* p < 0.05.

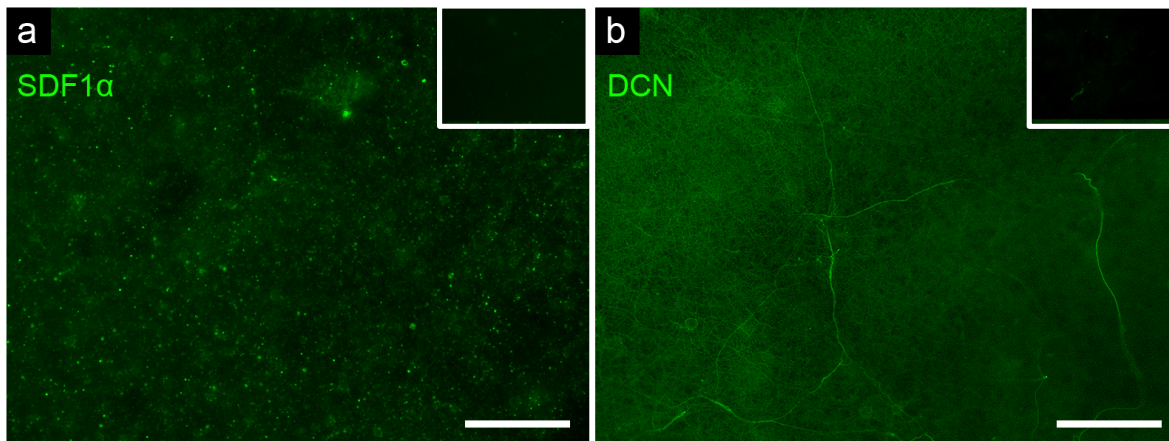

**Supplementary Figure S6:** Immunofluorescence staining of PEGdma-PLA scaffolds coated with either **(a)** DCN (green) or **(b)** SDF-1 $\alpha$  (green). Negative controls are displayed in the white box in the upper right corner of each image. Scale bars equal 100  $\mu$ m.

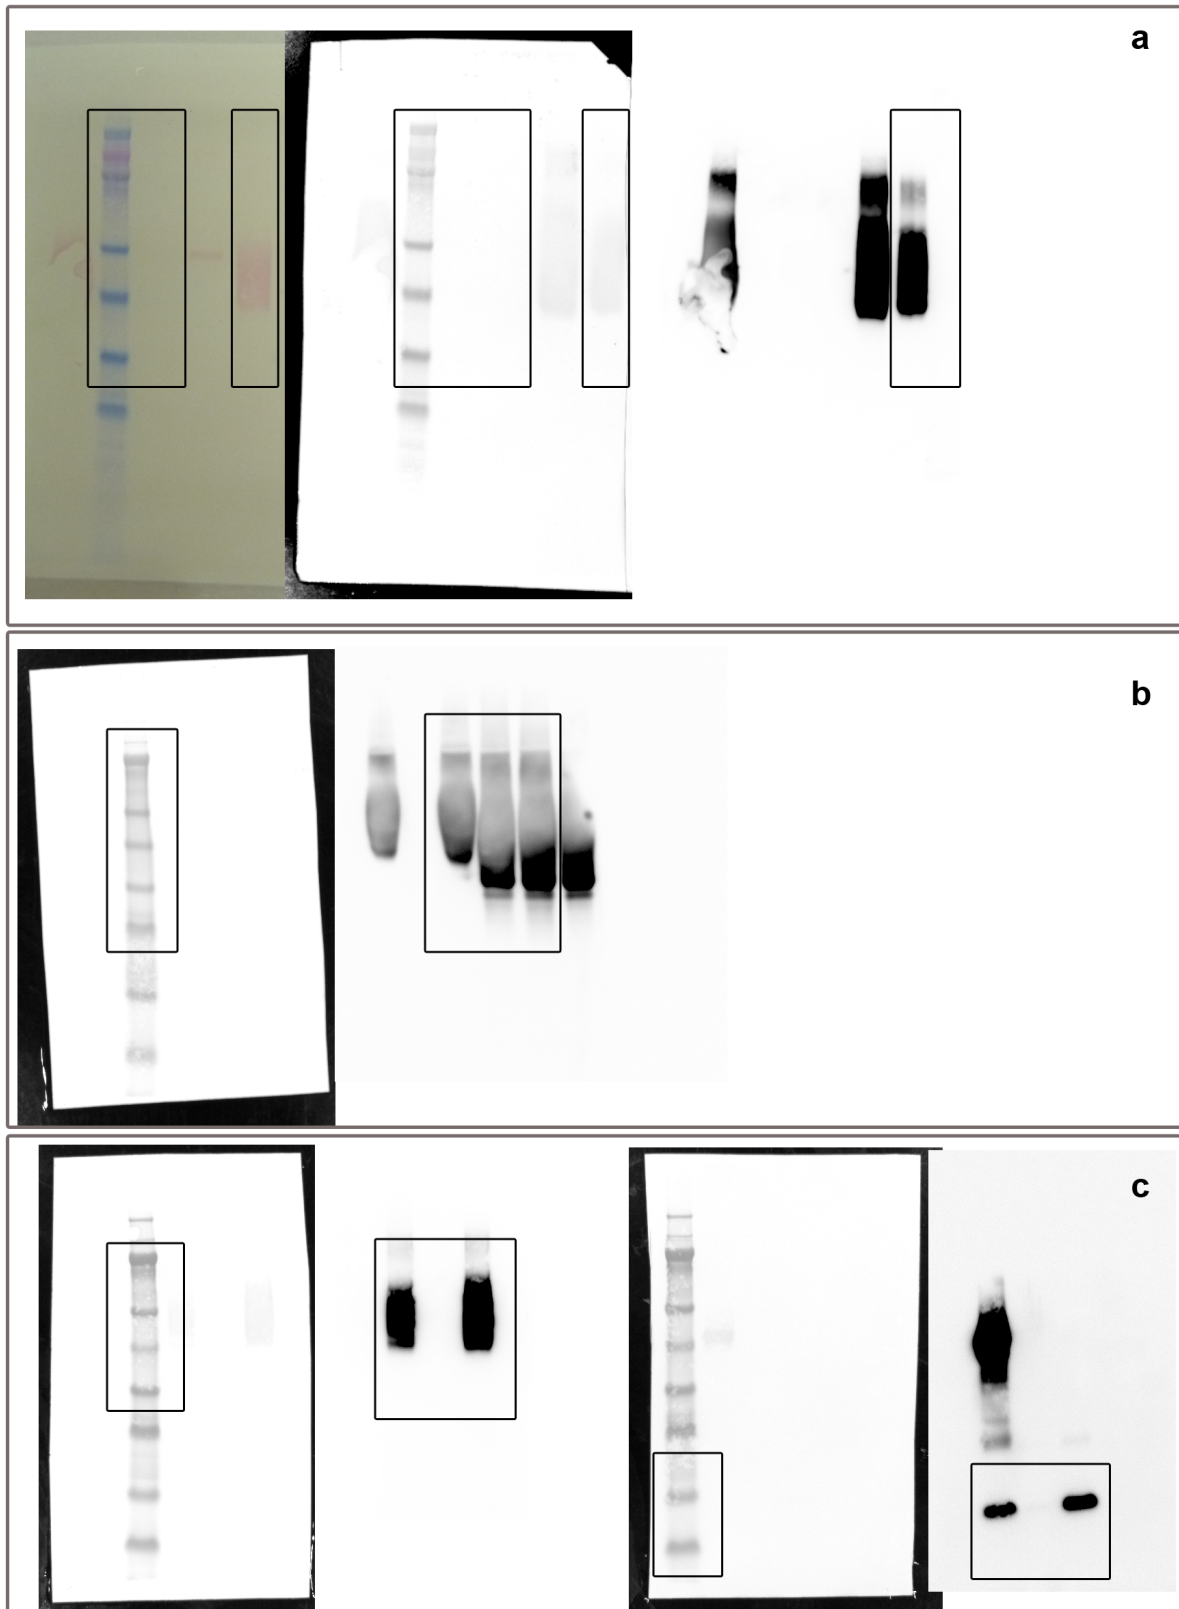

**Supplementary Figure S7:** Western blot and SDS-PAGE of the full membrane original images. **(a)** Belongs to Figure 1a and b, **(b)** displays original images of Figure 1c and **(c)** shows full image of Figure 1e and f. The black boxes are the selected areas used in Figure 1.
